# Supplementary material
Source: PubMed Central journal article supplement (PMC4055856)
Supplement: NIHMS584331-supplement-01.pdf [file NIHMS584331-supplement-01.pdf]

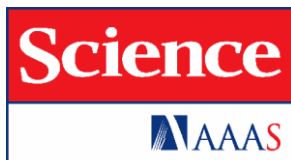

## Supplementary Materials for

### **mTOR Inhibition Alleviates Mitochondrial Disease in a Mouse Model of Leigh Syndrome**

Simon C. Johnson, Melana E. Yanos, Ernst-Bernhard Kayser, Albert Quintana, Maya Sangesland, Anthony Castanza, Lauren Uhde, Jessica Hui, Valerie Z. Wall, Arni Gagnidze, Kelly Oh, Brian M. Wasko, Fresnida J. Ramos, Richard D. Palmiter, Peter S. Rabinovitch, Philip G. Morgan, Margaret M. Sedensky, Matt Kaerberlein\*

\*Corresponding author. E-mail: [kaeber@uw.edu](mailto:kaeber@uw.edu)

Published 14 November 2013 on *Science Express*  
DOI: 10.1126/science.1244360

#### **This PDF file includes:**

Materials and Methods

Figs. S1 to S14

Tables S1 to S3

## **Materials and Methods**

### Animal Care

*Ndufs4* +/- breeders were obtained from the Palmiter laboratory at the University of Washington. Following colony expansion by backcrossing to C57Bl/6 CR mice, obtained from the NIA, *Ndufs4* +/- mice were bred as harems with heterozygous parents bred to produce *Ndufs4* -/- offspring. All mice were weaned at 20-21 days of age. *Ndufs4* -/- animals were always housed with a minimum of one control littermate for warmth and stimulation. All mice were weighed daily and food and gel were provided on the bottom of each cage so that ability to find food or water did not become a limiting factor for survival. Mice were euthanized if they showed a 20% loss in maximum body weight, immobility, or were found prostrate or unconscious. Mice used for rotarod and QMR were separate from those used in the lifespan so that the any stress resulting from these assays would not be a complicating factor in determining survival. *Ndufs4* heterozygous mice and wild-type mice were identical in each assay described here and thus were pooled as controls for the experiments described.

All care of experimental animals was in accordance with the University of Washington institutional guidelines and experiments were performed as approved by the Institutional Animal Care and Use Committee.

### Rapamycin Administration

Rapamycin was dissolved in DMSO to 100 mg/mL. This was diluted in 5% PEG-400/5% Tween-20 (vehicle) to a concentration of 1.2mg/mL, sterile filtered, aliquoted into 1mL portions, and stored at -80 for long-term storage. Rapamycin treated mice were injected with 66 microliters / 10g body weight for a final dosage of 8.0 mg/kg. Vehicle mice were injected with vehicle containing an equal volume of diluent and DMSO lacking rapamycin. Injections were performed intraperitoneally using 29 ½ gauge, 3/10 cc insulin syringes. The abdomen was briefly swabbed with an alcohol wipe prior to injection.

### Rotarod

Rotarod parameters were set at beginning speed of 0 rpm with an acceleration rate of 0.1 rpm/s and a maximum speed of 40 rpm. Mice underwent practice sessions on two consecutive days, with one session per day. The animals were tested 24 hours after the second practice day; mice underwent three rotarod sessions on the testing day, and latency-to-fall times were recorded. Median and maximum times were then calculated. The number of mice used for each data point is as indicated in Figure S5.

### Western Blotting

Whole-organs were rinsed of blood and flash-frozen in liquid nitrogen. Tissues were cryohomogenized on dry ice and the homogenized frozen powder was split for protein and RNA extractions. Protein was extracted by sonicating powdered tissue in RIPA buffer (10mM Tris-HCl pH 8.0, 1mM EDTA, 1% Triton X-100, 0.1% sodium deoxycholate, 0.1% SDS, 140mM NaCl) with Roche cOmplete Ultra protease inhibitor and PhosSTOP phosphatase inhibitor tablets added prior to use. Protein lysates were BCA'd using standard techniques and 20 micrograms protein per sample were run using

Novex minigels. Antibodies used were ordered from the following companies: Hsp60: Cell Signaling Technology #4870, LC3: Cell Signaling, #4108, Akt: Cell Signaling, #2920, pAkt: Cell Signaling, #4060, IGFR: Cell Signaling, #3027, pIGFR: Cell Signaling, #4568, Beclin: Novus Biologicals, NBP1-00088, CytC: MitoSciences, #MSA06, CoxIV: Cell Signaling, #4844, GAPDH: Novus Biologicals, NB300-322, Ndufs3: Invitrogen, #439200, Ndufs9 MitoSciences (MS Catalog Number MS111), p62: Cell Signaling, #5114, S6: Cell Signaling, #5317, pS6: Cell Signaling, #4856. Blots were blocked in 3% milk-TBST and all primary antibodies were used at 1:1000 in 0.3%-TBST milk.

### Tissue Staining

Tissues were fixed overnight in 4% formalin in PBS and cryoprotected by soaking in 30% sucrose in PBS until floating (24-48 hours). Oil-red-o staining was performed by the University of Washington Histology and Specialized Pathology Services core facilities by standard methods. Staining for Iba1 and GFAP were performed using 30- $\mu$ m free-floating sections were used. Paraffin sections were rehydrated through a series of graded ethanol solutions and boiled for 20 min in sodium citrate buffer, pH 6.0, for antigen unmasking. Sections were blocked with 10% normal donkey serum (NDS) in PBS-0.2% Triton X (PBST) for 1 h at room temperature and then incubated overnight at 4 °C in a wet chamber with primary antibodies diluted in 1%NDS-PBST (1:1,000 anti-GFAP, Sigma #G3893 , or 1:1,000 anti-Iba-1, Cell Signaling #019-19741). Slides were washed in PBST and incubated for 1 h at RT with Cy2- or Cy3-conjugated secondary antibodies (1:200 in 1% NDS-PBST; Jackson Immunoresearch). Sections were washed in PBS and counterstained with DAPI (Sigma) and coverslipped with aqueous mounting media (Fluoromount G; Electron Microscopy Science).

### Microscopy

All images were gathered with a Nikon Eclipse E600 bright field and fluorescence microscope at the University of Washington Keck Microscopy center. All image analysis was performed using the free analysis program ImageJ (<http://rsbweb.nih.gov/ij/>).

### Respiration assays

Respiration of freshly isolated mitochondria was measured with a Seahorse XF24 flux analyzer (Seahorse BioScience, Billerica, MA) following the manufacturers guidelines (<http://www.seahorsebio.com/resources/tech-writing/iso-mito-xf24.pdf>). Briefly: 5 $\mu$ g of mitochondria were adsorbed to the bottom of each sample well by spinning 50 $\mu$ l of mitochondrial suspension at 2000g for 20min at 4°C. The medium was MAS (70mM sucrose, 220mM mannitol, 10mM KH<sub>2</sub>PO<sub>4</sub>, 5mM MgCl<sub>2</sub>, 2mM HEPES, 1mM EGTA, 0.02% fatty acid-free BSA, pHed to 7.2 with KOH at 37°C) supplemented with electron donor substrate. Electron donor combinations for complex I dependent respiration were 5mM malate plus either 10mM pyruvate, 10mM glutamate or 10mM  $\alpha$ -ketoglutarate. For measuring complex I-independent respiration the complex II substrate succinate (13mM) in combination with the complex I inhibitor rotenone (2 $\mu$ M) was utilized. Before loading the plate into the Seahorse the assay volume of all wells, samples, and blanks was adjusted to 500 $\mu$ l by adding more of the same medium (MAS plus electron donors).

The instrument was programmed to execute the following protocol at 37°C: wait 10 min, mix 1min, wait 3 min, mix 1 min, wait 3 min, mix 1 min, measure 3 min, mix 1 min, measure 3 min state 2 respiration, mix 1min, inject ATP synthetase substrate ADP (4mM, pH'd to 7.2), mix 1min, measure 3min state3 respiration, mix 1min, inject ATP synthetase inhibitor oligomycin (2.5ug/ml), mix 1min, measure 3min state 4 respiration, mix 1min, inject uncoupler carbonyl cyanide 4-(trifluoromethoxy)-phenylhydrazone (= FCCP) (5uM), mix 1min, measure 3min uncoupled respiration, mix 1min, inject complex III inhibitor antimycin A (4uM), mix 1min, measure 3min respiratory chain-independent respiration. Concentrations given signify concentrations after injection in assay. Respiration rates for each well were determined using the Akos algorithm for OCR (oxygen consumption rate) (2009 Gerencser et al. *AnalChem*81 6868 - Seahorse - quantitative microplate-based respirometry with correction for oxygen diffusion), background corrected and normalized to ug of loaded protein. State3 and uncoupled respiration rates declined during the 3min measurement intervall and were therefore determined as the initial (maximum) respiration rate measured. State2 and state4 rates were stable and therefore reported as the average over the respective measurement interval. For each mitochondrial preparation these parameters were reported as the mean of 5 technical replicates.

#### Blue Native Gels (BNG)

BNG-PAGE was performed as described by Wittig et al. (2006 *Nature Protocols* 1(1) 418) with the modification that precast minigels (Novex, NativePAGE 3-12% Bis-Tris, BN2011BX10, 1mm thick) were used in an XCell SureLock Mini-Cell (Invitrogen). Key features of the sample treatment: 150ug of previously frozen mitochondria samples were extracted with either digitonin (6:1 detergent:protein w:w) or Triton X-100 (5:1 detergent:protein w:w) and protein complexes in the 15,000g supernatant were negatively charged with Coomassie Blue G-250 (1:8 detergent:dye w:w). Key features of the run: After 1h electrophoresis at 100V blue cathode buffer was replaced by cathode buffer without Coomassie blue and 300V were applied for an additional 1.5h. At the end of the run the overall protein distribution in the gel could be imaged without any additional Coomassie staining. Complex I in-gel activity (IGA) staining: Gels were incubated at room temperature with 2.5mM NADH and 0.5mM nitroblue tetrazolium (mod. of Sabar et al. *PlantJ*44 893). The purplish hue of the formazan reaction product identifies bands with NADH dehydrogenase activity were. (A prominent cross reactivity at about 200 kD is probably caused by dehydrolipoamide dehydrogenase (2009 *EH Meyer et al. PlantPhysiol*151 603)).

#### Metabolomics

Approximately 150 micrograms of cryohomogenized frozen tissue powder from each sample were sonicated, with 50 micron glass beads in 500 microliters of 80:20 methanol:H<sub>2</sub>O on dry ice, incubated for 30 minutes, then centrifuged for 10 min at 14,000 rpm in a microcentrifuge at 4 degrees C. Supernatant was moved to a new tube, on dry ice, and the extraction was repeated two more times. The total volume of extract was combined and lyophilized using a microcentrifuge rotovac at 14,000 rpm, 30 degrees C, with carbon dioxide filling the rotovac chamber prior to applying the vacuum and starting

centrifugation. Samples were submitted to the University of Washington Nutrition Obesity Research Center Analytic Core facility for analysis.

Dried samples were reconstituted in 5 mM ammonium acetate in 95% water/5% acetonitrile + 0.5% acetic acid and filtered prior to LC-MS analysis. The filtered samples were injected to the LC system which was composed of two Agilent 1260 binary pumps, an Agilent 1260 auto-sampler and Agilent 1290 column compartment containing a column-switching valve (Agilent Technologies, Santa Clara, CA). The chromatography was performed using Solvents A (5 mM ammonium acetate in H<sub>2</sub>O + 0.5% acetic acid + 0.5% acetonitrile) and B (acetonitrile + 0.5% acetic acid + 0.5% water), with 5% B for 2 min, 5% B to 80% B in 3 min, 80% B for 3 min, 80% B to 5% B in 3 min, and 5% B for 7 min. After the chromatographic separation, MS ionization and data acquisition was performed using an AB Sciex QTrap 5500 mass spectrometer (AB Sciex, Toronto, ON, Canada) equipped with electrospray ionization (ESI) source. Multiple-reaction-monitoring (MRM) mode was used for targeted data acquisition of 158 metabolites. The extracted MRM peaks were integrated using MultiQuant 2.1 software (AB Sciex, Toronto, ON, Canada). Reproducibility of the quality control samples indicated excellent technical reproducibility with an average CV of 7% for positive ion mode and 10% for negative ion mode detected metabolites.

#### Statistical Analysis

All data were presented as means +/- SEM. Comparisons between groups were performed using student t-tests, 2-tails. P<0.05 was considered significant and p<0.005 considered highly significant (designated \* and \*\* on bar graphs, respectively). Statistical comparisons of lifespan curves were performed using the log-rank test as indicated.

Metabolomic data q-value multiple testing correction was performed using the R plugin qvalue available at <http://genomics.princeton.edu/storeylab/qvalue/>.

#### Rapamycin Blood Level Analysis

Whole-blood samples were collected through cardiac puncture immediately following euthanasia into tubes containing EDTA. Samples were frozen and shipped on dry ice to the Javors lab in the Department of Psychiatry at the University of Texas Health Science Center San Antonio for analysis by HPLC.

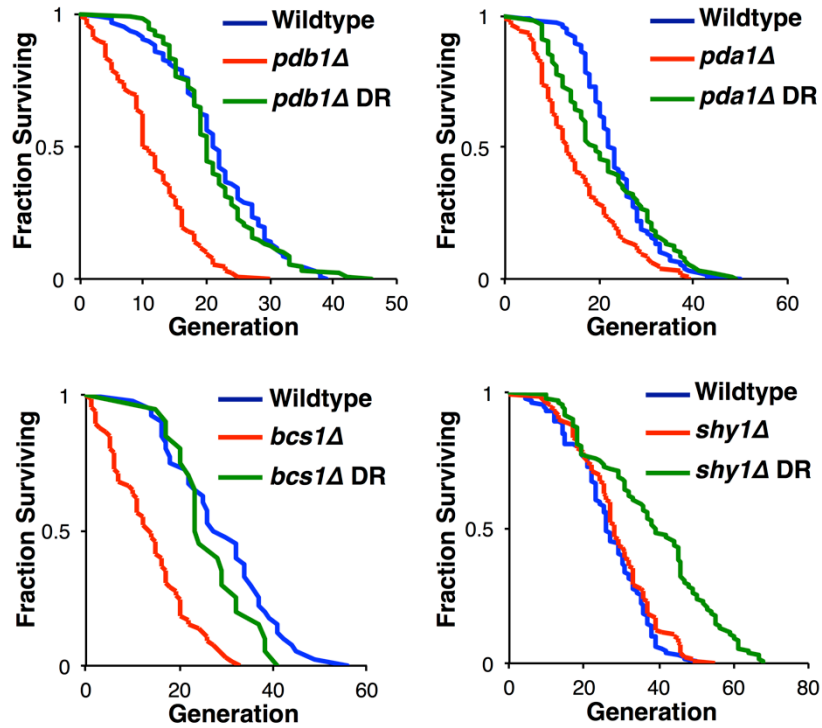

**Fig. S1.**

**Glucose Restriction Extends the Replicative Lifespan of Leigh Syndrome Homolog Mutants in Yeast.** Glucose restriction at 0.05% extends the replicative lifespan of *pdb1Δ*, *pda1Δ*, *bcs1Δ*, and *shy1Δ* cells. *pdb1Δ*, *pda1Δ*, *bcs1Δ* are short-lived compared to WT cells on regular media (2% glucose) while *shy1Δ* cells have a WT lifespan on regular media. Each plot shows experiment-matched data.

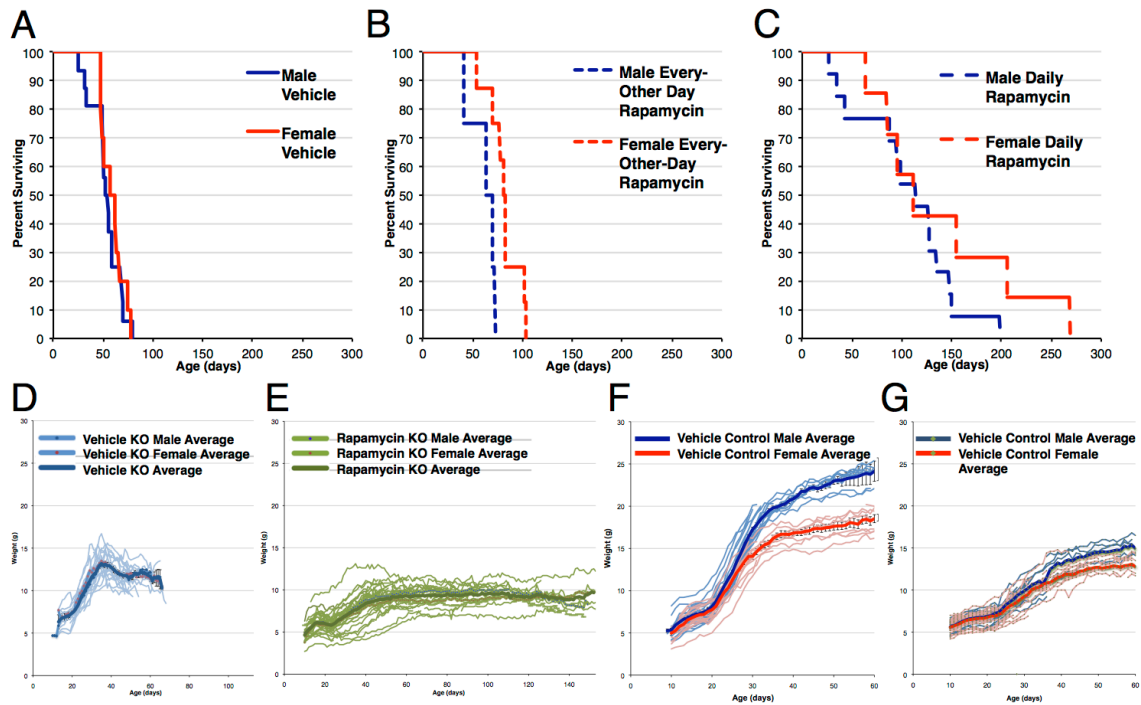

**Fig. S2**

**Lifespan and weight tracking data split by gender.** (A) Vehicle treated *Ndufs4* <sup>-/-</sup> mouse lifespan split by gender (n=16 and 10 for males and females, respectively). (B) Every-other-day rapamycin injected *Ndufs4* <sup>-/-</sup> mouse lifespan split by gender (n=4 and 8 for males and females, respectively). (C) Daily rapamycin injected *Ndufs4* <sup>-/-</sup> mouse lifespan split by gender (n= 13 and 7 for males and females, respectively). (D-G) Weight tracking of vehicle treated *Ndufs4* <sup>-/-</sup> (E), daily rapamycin treated *Ndufs4* <sup>-/-</sup> (F), vehicle treated control (G), and daily rapamycin treated control mice.

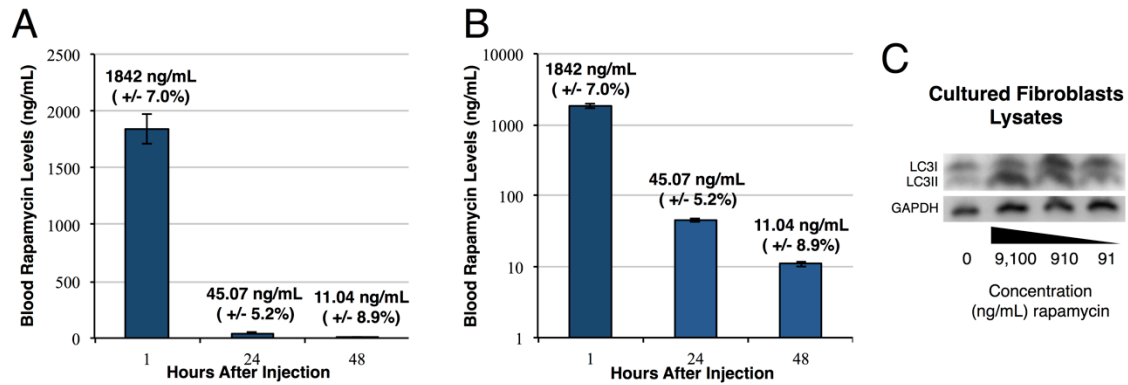

**Fig. S3**

**Blood levels of rapamycin following injection of 8mg/kg.** (A-B) Analysis of blood levels of rapamycin show a rapid decrease in blood levels by 24 hours post-injection (shown in linear (A) and log (B) scale). (C) Western blotting for LC3, a marker of mTOR inhibition, treated with rapamycin for 6 hours suggests that levels of rapamycin in mice at 24 hours post-injection are below levels necessary to induce pathways downstream of mTOR. Error bars represent +/- standard error of the mean (SEM), n=3 animals per data point.



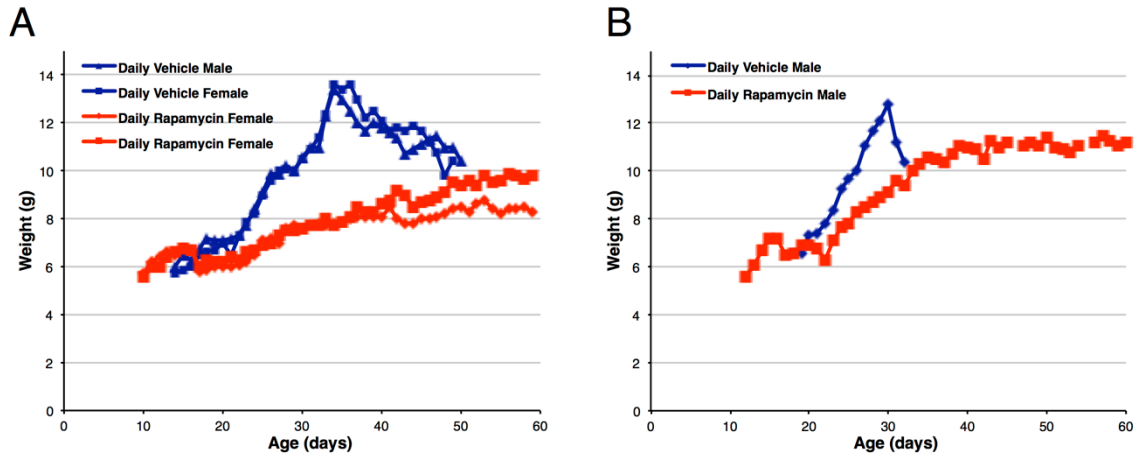

**Fig. S4**

**Daily rapamycin injection effect highly reproducible even among mice within the same litter.** (A-B) Two representative litters where pups were randomly assigned to vehicle or rapamycin treatment. In both litters the rapamycin response was robust. Response was also gender independent at this dose (see also Figure S1).

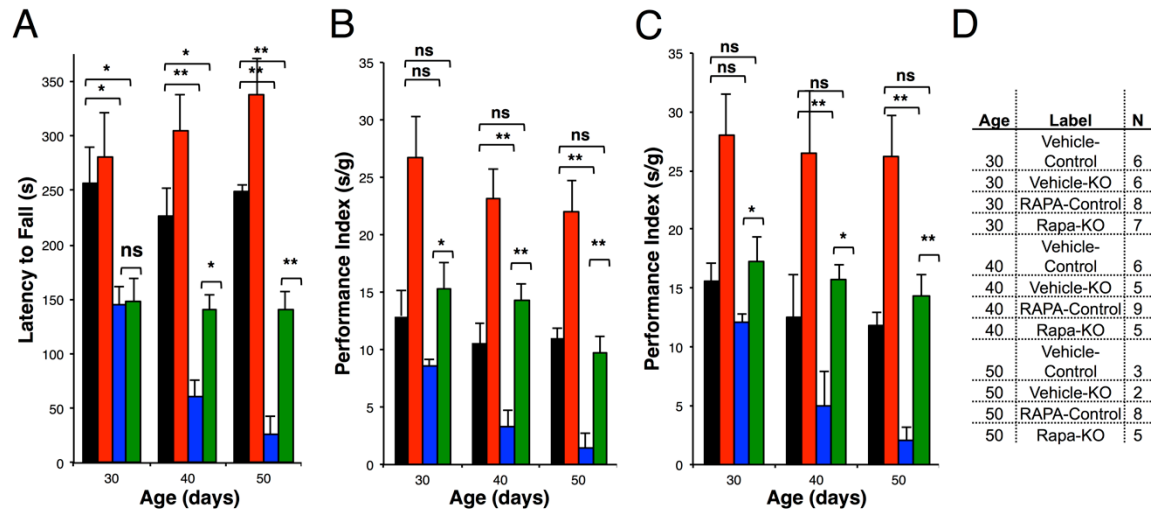

**Fig. S5**

**Additional Rotarod Data.** (A) Maximum latency to fall. (B) Weight-normalized median latency to fall (see Figure 1 for raw median latency to fall data). (C) Weight-normalized maximum latency to fall. (D) Number of mice assayed for each condition.

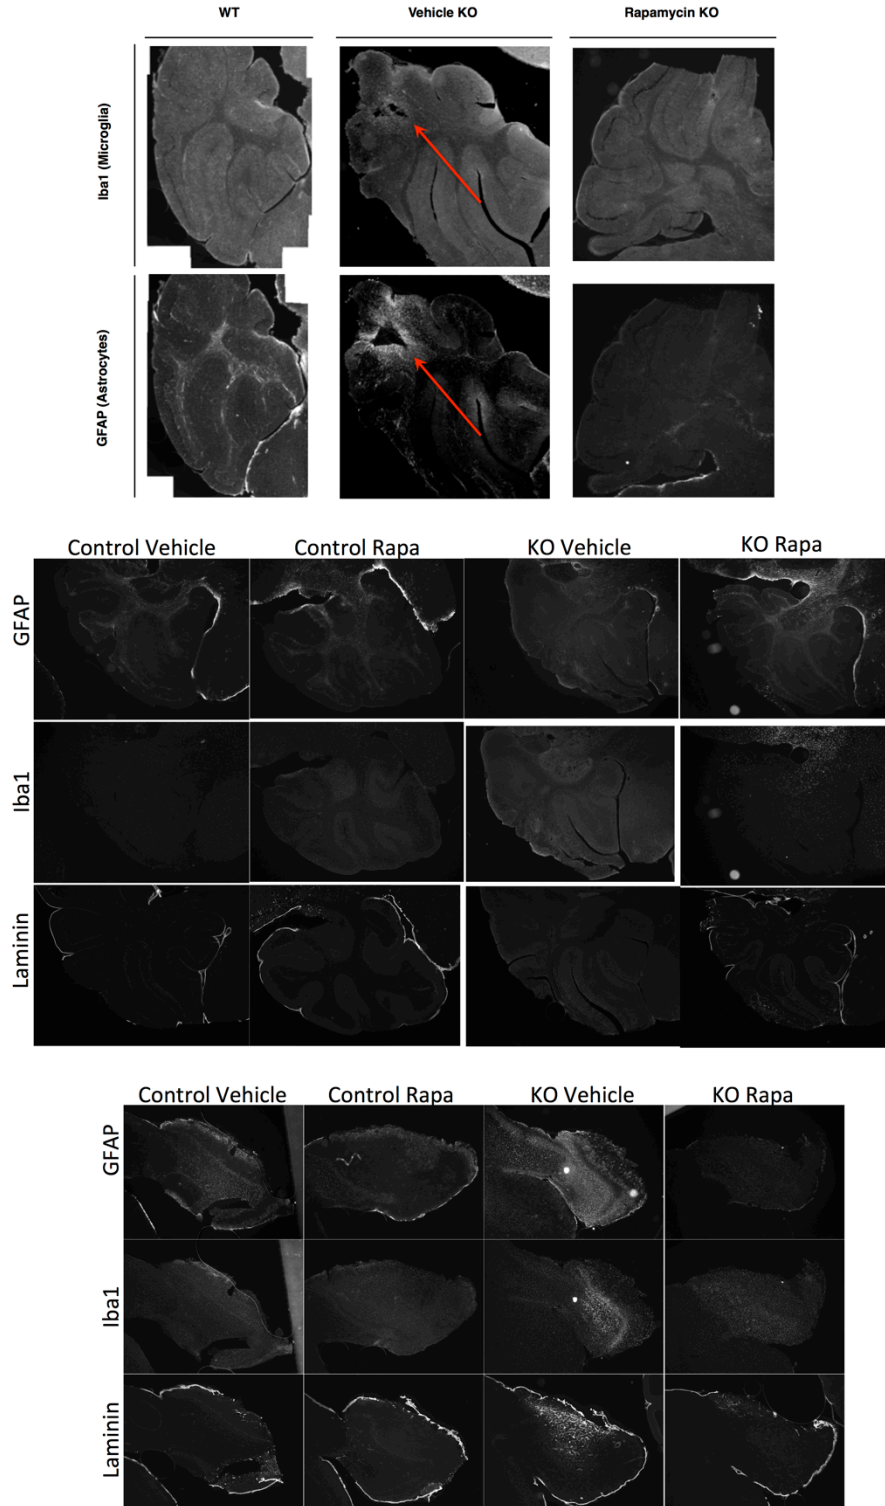

**Fig. S6**

**Additional Histology Images.** (Top two panels) Additional age-matched samples showing rescue of lesions in the cerebellum by rapamycin. (Bottom panels) Rapamycin has no overt effects on staining pattern or intensity in control animals.

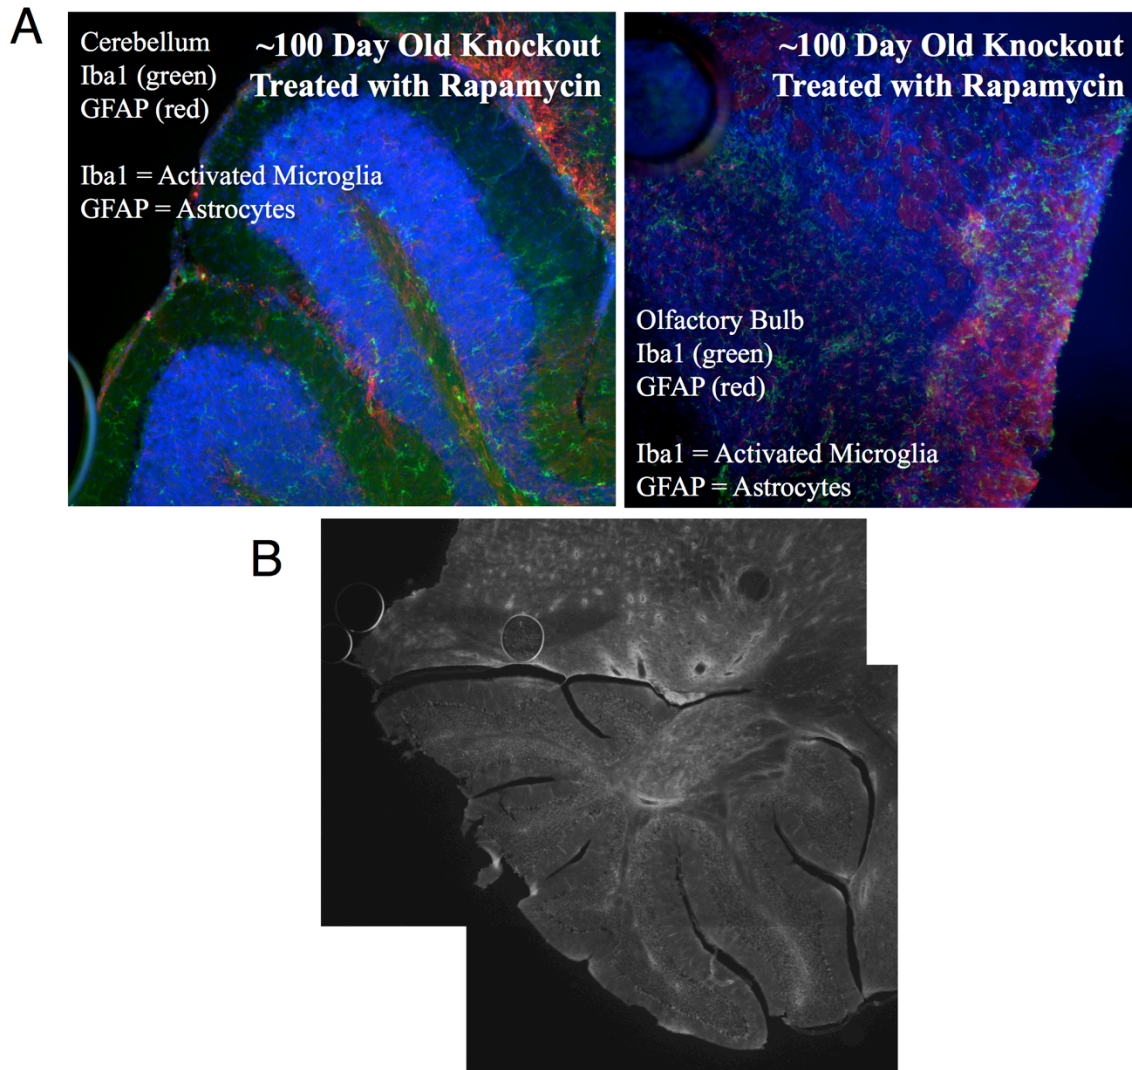

**Fig. S7**

**Absence of Overt Lesions in Brains from Very Long-Lived Rapamycin Treated Knockout Animals.** Brains from two very long-lived rapamycin treated knockout mice found dead in cage (FDIC) were removed from the corpse, fixed, stained, and imaged. The quality of stain and imaging is limited by the post-mortem condition, however in each of these cases there were no apparent lesions present at time of death. (A) A brain from an FDIC 100 day old rapamycin treated KO stained with Iba1 (green), GFAP (red), and DAPI (blue). (B) A brain from a 268 day old animal stained with Laminin. Compare to the overt lesions in Figure S6.

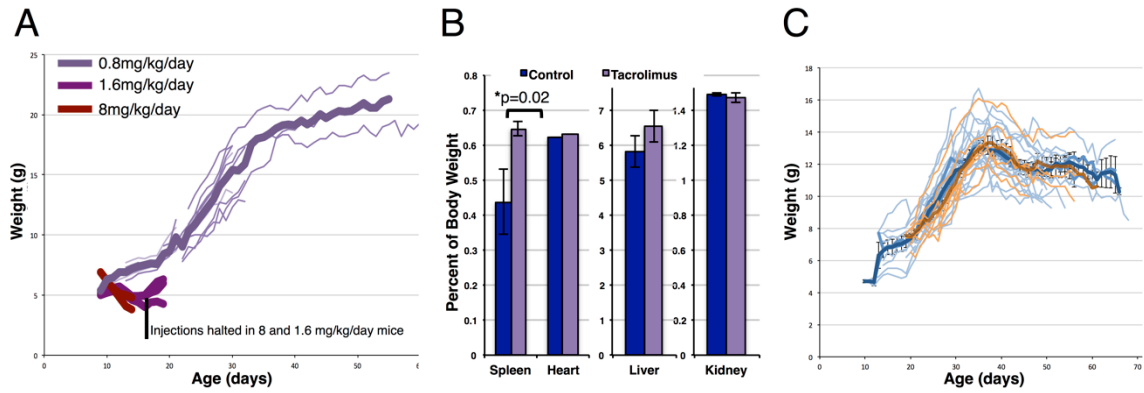

**Fig. S8**

**Highest tolerable dose of tacrolimus (FK-506) determined in control mice.** (A) Initial dose of 8 and 1.6 mg/kg/day were not tolerated by control mice as determined by weight loss during treatment. 0.8 mg/kg/day was tolerated and induced splenomegaly at 30 days (B). (C) Tacrolimus also had no effect on the weight phenotype of *Ndufs4*<sup>-/-</sup> mice. Error bars represent +/- SEM, p-value determined using students t-test, n=4 per data point.

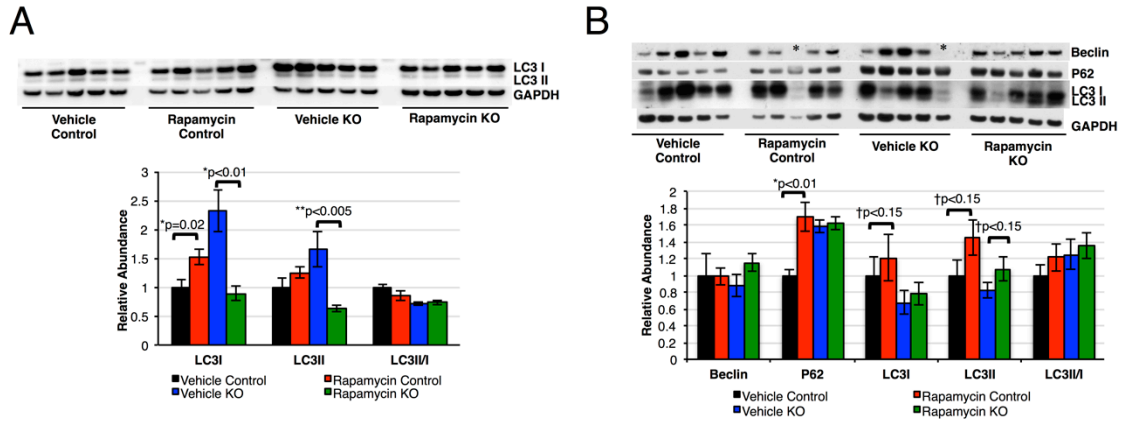

**Fig. S9**

**Daily rapamycin increases activation of autophagy in brain and liver.** (A) LC3 is increased in the brains of rapamycin treated control animals. *Ndufs4*  $-/-$  animals show an accumulation of LC3I and II, as has been observed in models associated with overactive mTOR, while rapamycin rescues LC3I and II to WT levels. No significant changes in LC3II/I ratio were observed in brain. (B) Liver homogenates from rapamycin treated animals show increases in P62 and LC3 and a trend toward increases in LC3I and LC3II. Outliers in the Beclin blot are denoted with (\*) and were excluded from the analysis, though changes were non-significant regardless of their inclusion. All values were normalized to GAPDH to account for variation in loading, with the exception of LC3II/I ratios. Error bars represent  $\pm$  SEM, p-values calculated using students t-test.

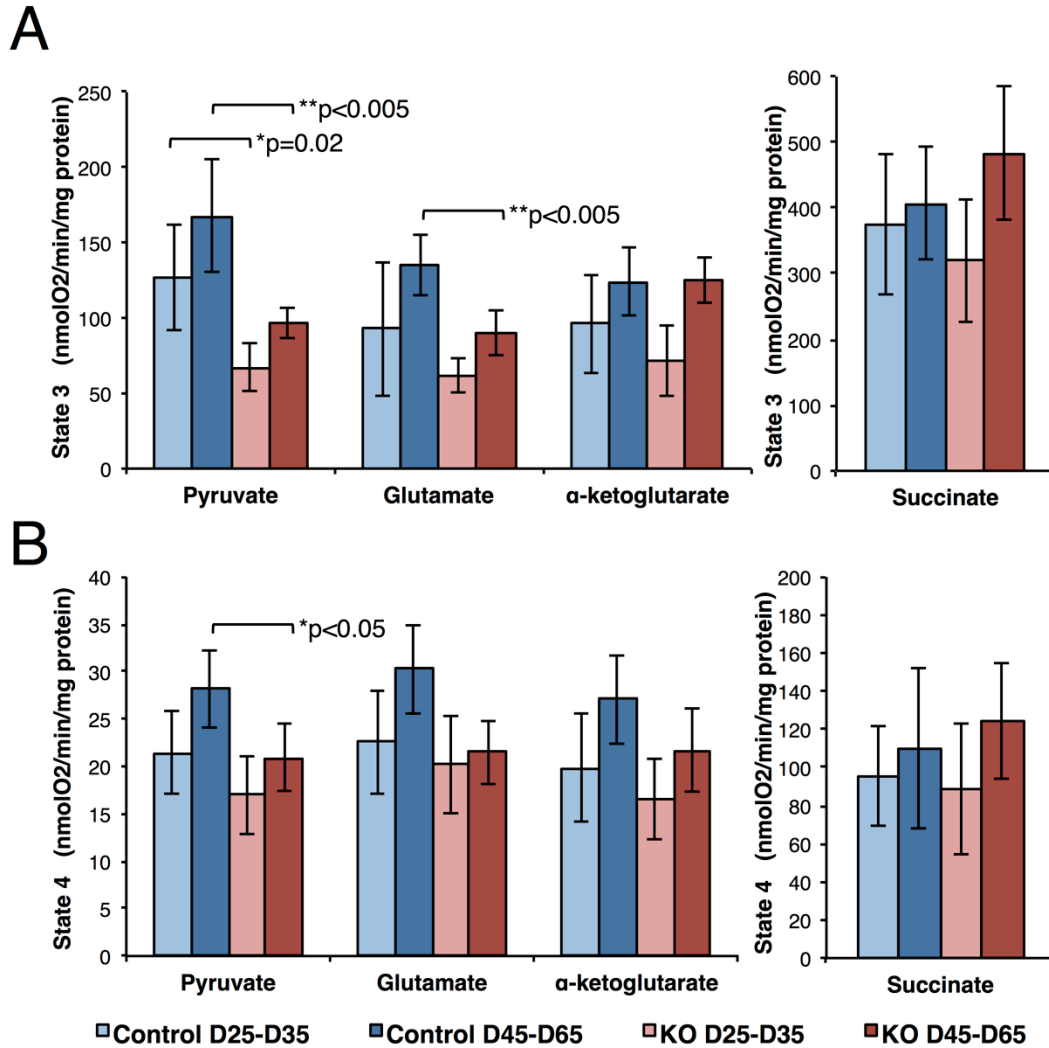

**Fig. S10**

**State 3 and state 4 defects in complex I driven respiration in *Ndufs4* <sup>-/-</sup> mice.**

Complex I deficiency was similar when analyzed by state 3 (A) or state 4 (B), although the state 3 deficiency appeared slightly more pronounced. Mitochondrial respiration through complex I appeared to increase with age but pyruvate and glutamate driven respiration were deficient at each age. Malate provided with each complex I substrate indicated.  $\alpha$ -ketoglutarate and succinate driven respiration were not effected by NDUFS4 deficiency. Error bars represent +/- SEM, p-values calculated using students t-test, n=4-6 animals per datapoint.



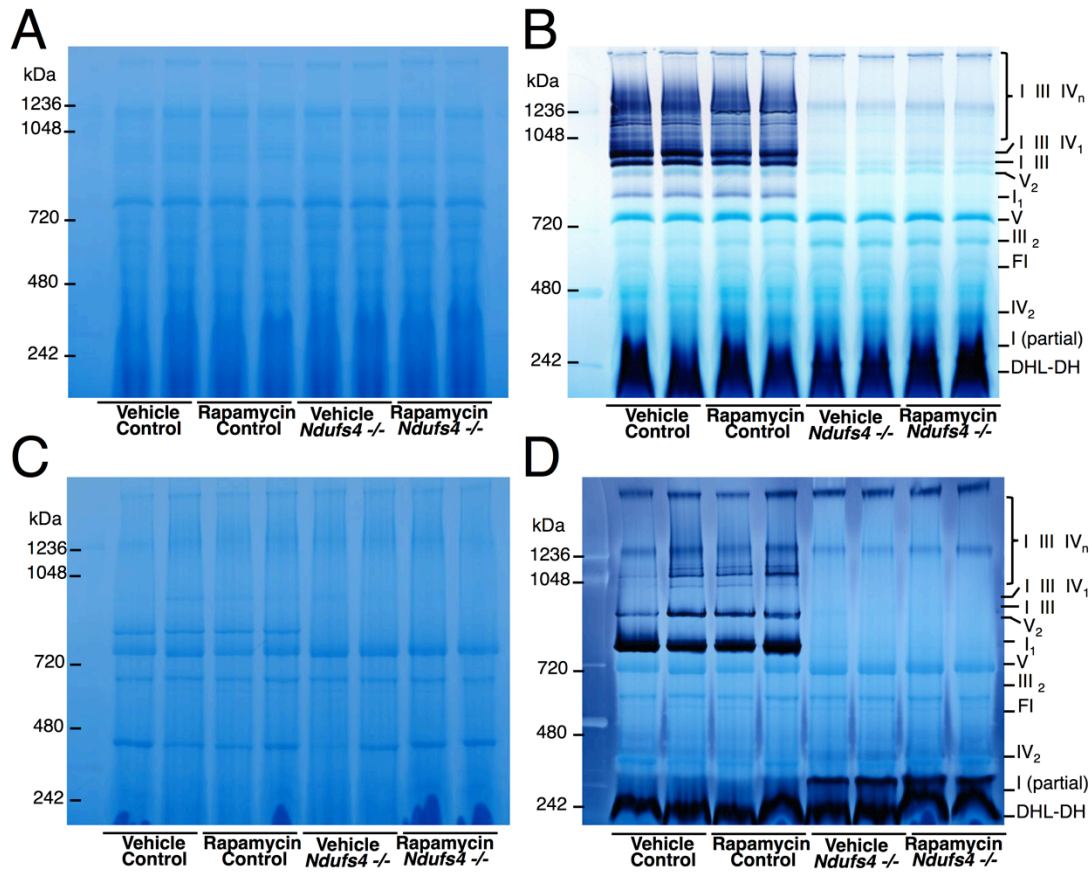

**Fig. S11**

**Additional blue-native in gel activity assay data.** Isolated brain mitochondria were analyzed by blue native gel (A,C) and stained using in gel staining for complex I activity (B,D). A mild, non-ionic detergent (digitonin) was used to analyze supercomplex formation (A-B), while a stronger detergent (Triton X-100) was used to analyze free complex I. The *Ndufs4*<sup>-/-</sup> mice had deficient complex I assembly and supercomplex incorporation and rapamycin had no effect on these features.



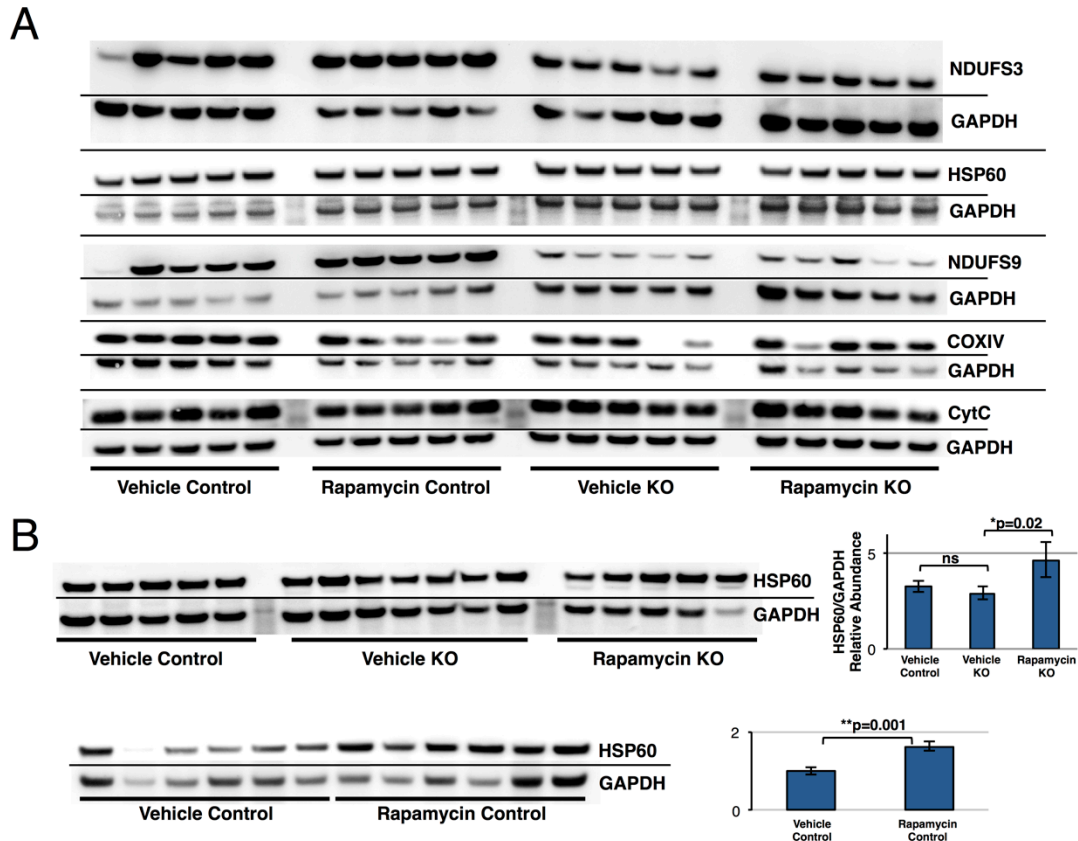

**Fig. S12**

**Additional western blot data.** (A) Western blots of whole-brain lysates corresponding to Figure 3. (B) HSP60 is induced in liver by rapamycin but is not induced in the *Ndufs4* <sup>-/-</sup> mice without treatment. Error bars represent +/- SEM, p-values calculated using students t-test.

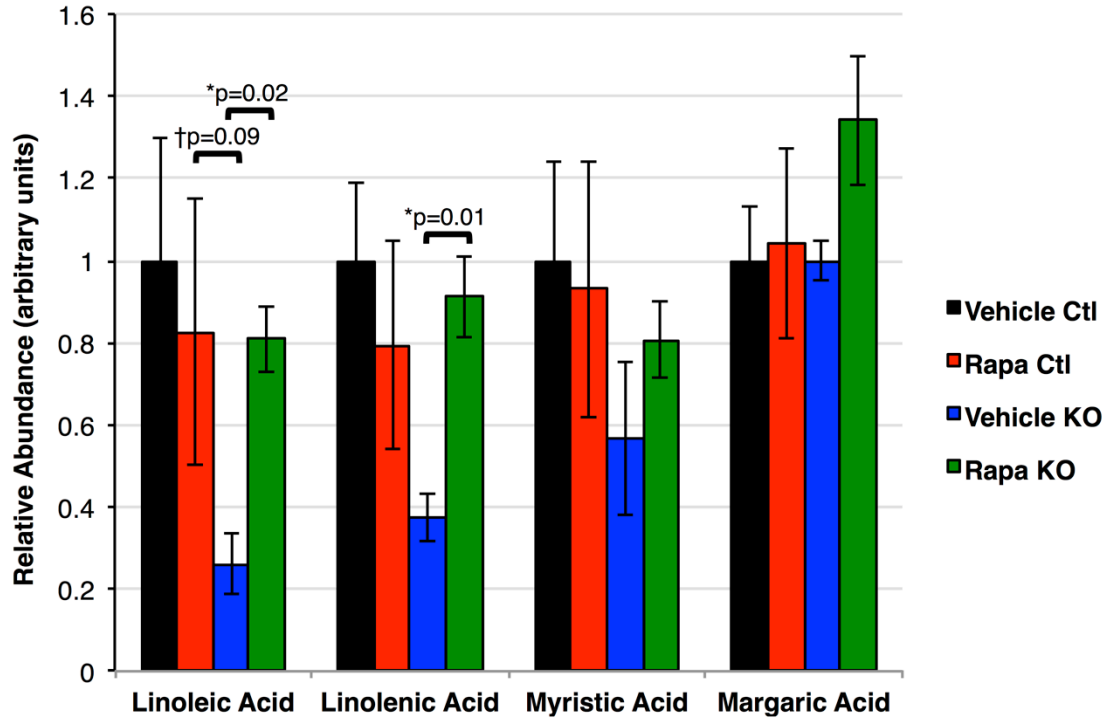

**Fig. S13**

**Free fatty acids in liver detected by metabolomics.** Free fatty acids are low in *Ndufs4* <sup>-/-</sup> animal liver and rescued by rapamycin. Error bars represent +/- SEM, p-values calculated using students t-test. n = 4 animals per treatment.

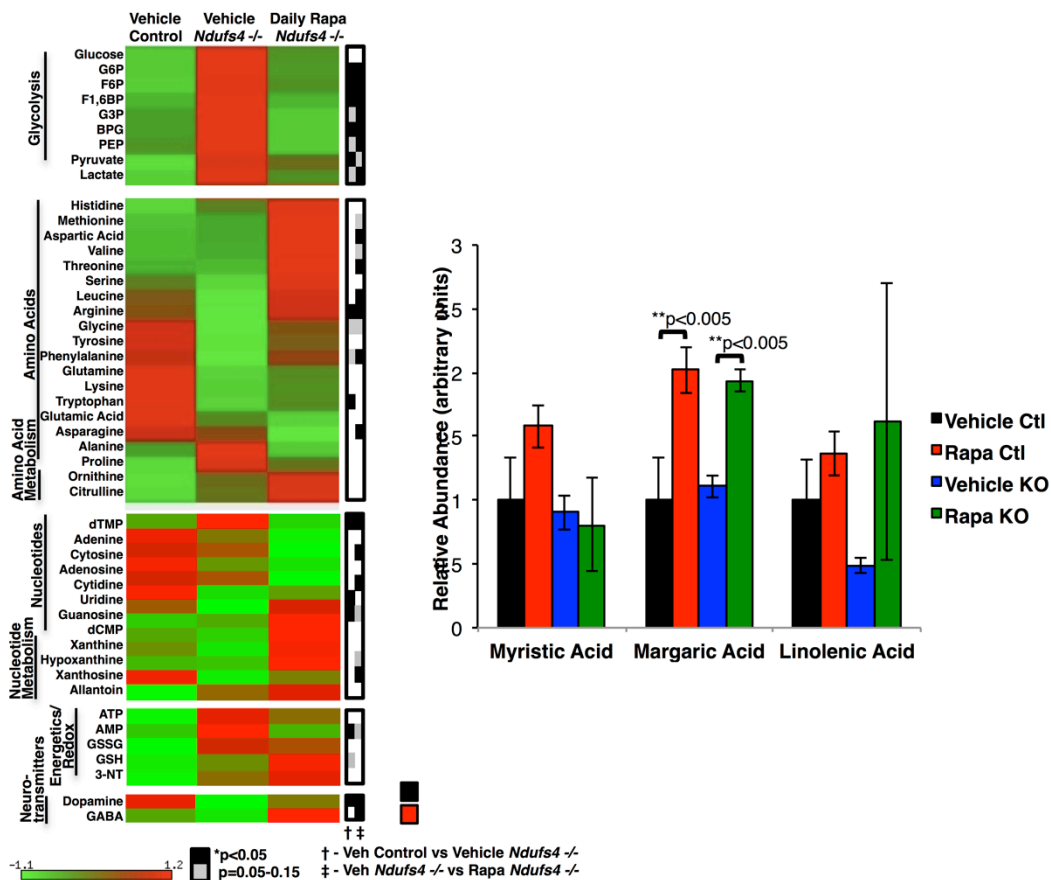

**Fig. S14**

**Metabolic profiling of *Ndufs4* -/- brains.** Metabolomic analysis of *Ndufs4* -/- mouse brains revealed an accumulation of glycolytic intermediates that is rescued by rapamycin. Rapamycin treatment also increases levels of free-amino acids and free-fatty acids, overall consistent with a shift from glycolysis to amino acid and fat catabolism pathways. The effects of rapamycin on KO animals is distinct from those on control animals and the effects on control mice are not intuitively informative in the setting of the KO animals and will require further study (See also **Supplemental Table 1** for data, statistics, and rapamycin treated control mouse data). Error bars represent +/- SEM, p-values calculated using students t-test. n = 4 animals per treatment.

|                          | Control |           | KO      |           |
|--------------------------|---------|-----------|---------|-----------|
|                          | Vehicle | Rapamycin | Vehicle | Rapamycin |
| Pyruvate                 | 5763    | 10200     | 13385   | 9491      |
| lactate                  | 1787418 | 2929369   | 2647574 | 2034107   |
| Acetoacetate             | 4465    | 7495      | 6379    | 3588      |
| Fumaric                  | 2458    | 2698      | 2456    | 3478      |
| Succinate                | 1910182 | 2663515   | 2350145 | 1206851   |
| Nicotinate (Niacin)      | 20471   | 28959     | 23267   | 18681     |
| Glutaric Acid            | 9177    | 13057     | 9921    | 8355      |
| Malate                   | 1867961 | 3843908   | 3527238 | 3582776   |
| Hypoxanthine             | 1141017 | 2206619   | 752462  | 1786635   |
| Alpha-Ketoglutaric Acid  | 54218   | 122628    | 52141   | 76741     |
| Xanthine                 | 115990  | 280033    | 87015   | 239200    |
| Urate                    | 5717    | 7673      | 4094    | 2634      |
| PEP                      | 21578   | 48057     | 39046   | 16265     |
| D-GA3P                   | 310469  | 629060    | 472542  | 502060    |
| Glycerol-3-P             | 1127563 | 935167    | 406639  | 187431    |
| Hyppuric Acid            | 4190    | 7588      | 5394    | 7918      |
| Glucose                  | 21030   | 29715     | 26093   | 22220     |
| 4-Pyridoxic acid         | 2106    | 2713      | 973     | 1656      |
| 2/3-Phosphoglyceric Acid | 51335   | 77067     | 130036  | 33025     |
| Erythrose                | 18885   | 35698     | 26111   | 137244    |
| Cystathionine            | 5308    | 8638      | 5449    | 6200      |
| G1P/G6P                  | 632620  | 1486201   | 1157583 | 738145    |
| Reduced glutathione      | 25534   | 52063     | 41382   | 63320     |
| F16BP/F26BP              | 350646  | 618019    | 831547  | 351717    |
| Sucrose                  | 4418    | 6170      | 5786    | 4864      |
| Oxidized glutathione     | 1600865 | 2575830   | 2115551 | 2026434   |
| gama-Aminobutyrate       | 2149    | 3787      | 2008    | 2551      |
| Malonic Acid/3HBA        | 58393   | 75980     | 40433   | 28706     |
| Citraconic Acid          | 38571   | 66620     | 59710   | 43861     |
| Adenine                  | 95109   | 124365    | 83608   | 70607     |
| Aconitate                | 11259   | 11177     | 10767   | 8800      |
| Citrulline               | 22542   | 67477     | 28933   | 37208     |
| Citric Acid              | 1633612 | 2841223   | 2135206 | 2228926   |
| Cystine                  | 27606   | 39241     | 34250   | 32160     |
| Xanthosine               | 55786   | 86542     | 53100   | 108769    |
| Uracil                   | 4574    | 4339      | 6778    | 6161      |
| OH-Phenylpyruvate        | 9576    | 11600     | 12160   | 10960     |
| Anthranilate             | 8501    | 13020     | 11704   | 6466      |
| Glucuronate              | 22253   | 36441     | 32409   | 31890     |
| Oxaloacetate             | 8244    | 11027     | 7879    | 7923      |
| Propionate               | 540     | 1542      | 1198    | 420       |
| 2-Aminoadipate           | 12283   | 25496     | 17633   | 14105     |
| 3-Nitro-tyrosine         | 441     | 803       | 584     | 679       |
| Ribose-5-P               | 271347  | 493242    | 219540  | 362983    |
| Adenylosuccinate         | 30028   | 40834     | 29132   | 28344     |
| D-Leucic Acid            | 42577   | 82250     | 81256   | 84569     |
| Pyridoxal-5-P            | 3162    | 4400      | 3827    | 3904      |
| Adipic Acid              | 1904    | 3872      | 4051    | 3874      |
| Maleic Acid              | 2262    | 3359      | 2244    | 3716      |
| Methylmalonate           | 1898008 | 2531103   | 2316718 | 1253120   |
| DHAP                     | 313188  | 625799    | 472129  | 536446    |
| Chenodeoxycholate        | 0       | 505       | 428     | 586       |
| G16BP                    | 315617  | 580765    | 774977  | 343008    |
| F6P/F1P                  | 583396  | 1434819   | 1092519 | 728613    |
| Oxalic Acid              | 4141    | 6021      | 5992    | 4236      |
| Glyceraldehyde           | 7061    | 10828     | 10167   | 7607      |
| Glycerate                | 50939   | 62087     | 55408   | 91575     |

**Table S1 (page 1 of 2)**

**Metabolomics data.** Values are averages of four biological replicates per treatment group. Standard error of mean (SEM) provided in Table S2 and statistical significance (p-values and multiple-testing corrected q-values) are provided in Table S3.

|                            |          |          |         |         |
|----------------------------|----------|----------|---------|---------|
| Mevalonate                 | 24496    | 54248    | 52689   | 69269   |
| Allantoin                  | 3381     | 5016     | 4463    | 5031    |
| Inositol                   | 7258     | 11743    | 10843   | 8717    |
| Homovanilate               | 1178     | 1589     | 1451    | 2970    |
| Xanthurenate               | 5065     | 7884     | 5283    | 4374    |
| Pentothenate               | 345246   | 613383   | 408026  | 400511  |
| Biotin                     | 115983   | 144656   | 133023  | 152714  |
| DCMP                       | 1069     | 1489     | 1269    | 2349    |
| DUMP                       | 26853    | 41303    | 30666   | 22758   |
| Geranyl Pyrophosphate      | 12023    | 22585    | 17169   | 18671   |
| DTMP                       | 61803    | 87344    | 101021  | 51884   |
| CMP                        | 3858     | 7620     | 6388    | 6348    |
| AMP                        | 432294   | 691367   | 829794  | 468492  |
| IMP                        | 1283594  | 2525042  | 1866841 | 2324187 |
| ATP                        | 56715    | 99507    | 84060   | 72888   |
| Fructose/Galactose         | 42628    | 50748    | 59169   | 29624   |
| Aspartic Acid              | 2193463  | 3724623  | 2329225 | 3563405 |
| Myristic Acid              | 1929     | 3045     | 1741    | 1557    |
| Margaric Acid              | 1790     | 3615     | 1989    | 3467    |
| Linolenic Acid             | 16516    | 22621    | 8090    | 26683   |
| Glycine                    | 72050    | 62301    | 54032   | 65318   |
| Trimethylamine-N-oxide     | 55237    | 22503    | 49005   | 35334   |
| Alanine                    | 549836   | 577670   | 604864  | 536832  |
| Aminoisobutyrate           | 86457    | 77670    | 51559   | 68375   |
| Choline                    | 10792014 | 10229464 | 7048155 | 7353389 |
| Dimethylglycine            | 6442326  | 6004327  | 4164721 | 5195609 |
| Serine                     | 434783   | 494706   | 417673  | 462394  |
| Creatinine                 | 164483   | 167101   | 172144  | 143470  |
| Proline                    | 1062905  | 1381237  | 1160235 | 1105888 |
| Valine                     | 45077    | 78230    | 46277   | 62152   |
| Betaine                    | 1643200  | 1893314  | 1438637 | 1423651 |
| Threonine                  | 19525    | 34471    | 18796   | 32952   |
| Taurine                    | 2648589  | 2687386  | 2629420 | 2455941 |
| Creatine                   | 6711367  | 8138682  | 6339275 | 6208909 |
| Hydroxyproline             | 391362   | 415196   | 342951  | 368238  |
| Leucine                    | 750654   | 1190736  | 606220  | 846935  |
| Ornithine                  | 22347    | 39377    | 25310   | 28212   |
| Acetylcholine              | 354672   | 347974   | 355276  | 269735  |
| Glutamine                  | 6166011  | 7677029  | 5569783 | 5751312 |
| Glutamic acid              | 6762940  | 8014350  | 6368883 | 6169770 |
| Methionine                 | 53908    | 95055    | 57484   | 86889   |
| Cystamine                  | 1435     | 1439     | 1339    | 1471    |
| Histidine                  | 214232   | 258254   | 237908  | 281721  |
| Carnitine                  | 1535     | 1537     | 1789    | 2155    |
| Phenylalanine              | 756907   | 907213   | 481623  | 697245  |
| Quinolate                  | 1970     | 2013     | 1602    | 1680    |
| Arginine                   | 306722   | 685601   | 207167  | 358050  |
| Tyrosine                   | 143319   | 233594   | 133177  | 139121  |
| Sorbitol                   | 4531     | 8015     | 4431    | 4052    |
| Epinephrine/Normetanephrin | 43716    | 38020    | 30922   | 28071   |
| Tryptophan                 | 172415   | 177694   | 92256   | 117666  |
| Uridine                    | 209662   | 169032   | 156384  | 172332  |
| Adenosine                  | 5635702  | 3371571  | 3613535 | 2467905 |
| Inosine                    | 4112936  | 4411652  | 3211665 | 3515166 |
| Guanosine                  | 360272   | 349052   | 184989  | 417452  |
| Lysine                     | 6189319  | 7652597  | 5508838 | 5697854 |
| Cytosine/Histamine         | 29415    | 28420    | 27309   | 19005   |
| Homoserine                 | 6775     | 8040     | 5846    | 8111    |
| Niacinamide                | 3338369  | 3345088  | 2428052 | 2816219 |
| 1-Methylhistamine          | 51714    | 49608    | 53200   | 46846   |
| Asparagine                 | 52615    | 51016    | 46724   | 32141   |
| Cytidine                   | 203524   | 172821   | 187252  | 125115  |
| Pyroglutamic Acid          | 2359902  | 3131725  | 1863864 | 2215769 |
| 1-Methyladenosine          | 132898   | 109103   | 128329  | 97701   |
| 1-Methylguanosine          | 1919     | 1972     | 1909    | 1227    |
| N2,N2-Dimethylguanosine    | 2402     | 1763     | 2309    | 1740    |

**Table S1 (page 2 of 2).**

**Metabolomics data.** Values are averages of four biological replicates per treatment group. Standard error of mean (SEM) provided in Table S2 and statistical significance (p-values and multiple-testing corrected q-values) are provided in Table S3.

|                | Vehicle Ctl | Rapa Ctl | Vehicle KO | Rapa KO |
|----------------|-------------|----------|------------|---------|
| Pyruvate       | 1717        | 547      | 983        | 1571    |
| lactate        | 503685      | 248757   | 169015     | 128379  |
| Acetoacetate   | 1281        | 796      | 403        | 885     |
| Fumaric        | 723         | 606      | 363        | 374     |
| Succinate      | 545005      | 245427   | 108037     | 498338  |
| inate (Niacin) | 7620        | 4161     | 2821       | 1722    |
| Glutaric Acid  | 2956        | 3353     | 736        | 445     |
| Malate         | 542722      | 982275   | 257468     | 446987  |
| Hyposanthine   | 327252      | 399103   | 134990     | 628841  |
| oglutamic Acid | 20184       | 37283    | 3383       | 2051    |
| Xanthine       | 34372       | 105012   | 9148       | 127629  |
| Urate          | 1860        | 2209     | 251        | 474     |
| PEP            | 6796        | 12820    | 5114       | 4739    |
| D-GA3P         | 102301      | 139687   | 55402      | 191577  |
| Glycerol-3-P   | 345890      | 316081   | 54612      | 58684   |
| Hyppuric Acid  | 1667        | 2760     | 647        | 4992    |
| Glucose        | 6746        | 1641     | 2707       | 12379   |
| Pyridoxic acid | 684         | 774      | 232        | 1066    |
| oglyceric Acid | 17206       | 21168    | 23213      | 11359   |
| Erythrose      | 6591        | 3530     | 4587       | 80235   |
| Cystathionine  | 2094        | 1806     | 964        | 1384    |
| G1P/G6P        | 177554      | 110702   | 76424      | 20239   |
| ed glutatione  | 7245        | 11383    | 7818       | 29264   |
| F16BP/F26BP    | 109323      | 165325   | 91600      | 137578  |
| Sucrose        | 1405        | 274      | 344        | 534     |
| d glutathione  | 463626      | 261441   | 109202     | 690891  |
| minobutyrate   | 663         | 886      | 125        | 98      |
| ic Acid/3HBA   | 18021       | 10156    | 4678       | 2763    |
| itraconic Acid | 11095       | 11266    | 4121       | 9396    |
| Adenine        | 26719       | 16498    | 6268       | 18359   |
| Aconitate      | 5187        | 2123     | 1151       | 1695    |
| Citrulline     | 6571        | 19412    | 2586       | 8014    |
| Citric Acid    | 484126      | 504433   | 94778      | 292631  |
| Cystine        | 8033        | 3427     | 1102       | 1315    |
| Xanthosine     | 15948       | 15638    | 3358       | 15076   |
| Uracil         | 1299        | 331      | 481        | 1954    |
| ienylpyruvate  | 2874        | 579      | 569        | 650     |
| Anthranilate   | 3147        | 1477     | 1819       | 2069    |
| Glucuronate    | 6424        | 840      | 1600       | 1754    |
| Oxaloacetate   | 2636        | 2104     | 682        | 103     |
| Propionate     | 160         | 271      | 133        | 120     |
| Aminoadipate   | 4834        | 3456     | 2514       | 719     |
| Vitro-tyrosine | 138         | 33       | 52         | 102     |
| Ribose-5-P     | 78093       | 67274    | 14364      | 75349   |
| nylosuccinate  | 9296        | 6604     | 2819       | 10421   |
| D-Leucic Acid  | 12716       | 21838    | 4077       | 20789   |
| Pyridoxal-5-P  | 914         | 357      | 175        | 287     |
| Adipic Acid    | 624         | 802      | 1438       | 611     |
| Maleic Acid    | 662         | 562      | 541        | 447     |
| thylmalonate   | 543876      | 226401   | 111116     | 524078  |
| DHAP           | 104196      | 121092   | 64933      | 207229  |
| G16BP          | 97331       | 162108   | 101542     | 137072  |
| F6P/F1P        | 164444      | 106074   | 59595      | 16815   |
| Oxalic Acid    | 1182        | 727      | 361        | 352     |
| yceraldehyde   | 2275        | 829      | 692        | 1540    |
| Glycerate      | 20230       | 3630     | 12047      | 74277   |
| ---            | ----        | ----     | ----       | -----   |

**Table S2 (page 1 of 2).**

**Standard error of the mean values for data in Table S1.**

|                   |         |         |         |         |
|-------------------|---------|---------|---------|---------|
| Mevalonate        | 8597    | 8754    | 8587    | 28532   |
| Allantoin         | 1164    | 466     | 458     | 80      |
| Inositol          | 2162    | 885     | 586     | 473     |
| Homovanilate      | 343     | 113     | 85      | 293     |
| Kanthurenate      | 1690    | 1199    | 767     | 841     |
| Pentothenate      | 102457  | 41221   | 29400   | 67219   |
| Biotin            | 34233   | 13680   | 3707    | 24456   |
| DCMP              | 301     | 131     | 90      | 1163    |
| DUMP              | 8282    | 3720    | 3355    | 5755    |
| Pyrophosphate     | 3463    | 2747    | 430     | 2813    |
| DTMP              | 17798   | 10064   | 6022    | 14186   |
| CMP               | 1157    | 1373    | 307     | 655     |
| AMP               | 121881  | 203990  | 99176   | 194414  |
| IMP               | 367017  | 454386  | 79923   | 540394  |
| ATP               | 17797   | 9948    | 4625    | 11387   |
| Glucose/Galactose | 15925   | 3386    | 9267    | 4027    |
| Aspartic Acid     | 645538  | 541032  | 93887   | 229900  |
| Myristic Acid     | 649     | 520     | 256     | 699     |
| Margaric Acid     | 596     | 649     | 159     | 150     |
| Linolenic Acid    | 5174    | 3972    | 995     | 17979   |
| Glycine           | 10386   | 5140    | 3080    | 5762    |
| Alanine-N-oxide   | 13809   | 4353    | 2741    | 12787   |
| Alanine           | 72156   | 48809   | 34654   | 50569   |
| Isobutyrate       | 12728   | 12757   | 2478    | 14207   |
| Choline           | 1345604 | 1198198 | 535605  | 390119  |
| Methylglycine     | 447165  | 975847  | 357074  | 1031551 |
| Serine            | 48242   | 43704   | 52422   | 31619   |
| Creatinine        | 21586   | 11893   | 13226   | 10209   |
| Proline           | 128243  | 146851  | 71188   | 61607   |
| Valine            | 5537    | 9949    | 4523    | 6883    |
| Betaine           | 141053  | 390049  | 110653  | 76666   |
| Threonine         | 3672    | 4452    | 1149    | 5010    |
| Taurine           | 422978  | 264287  | 169207  | 238261  |
| Creatine          | 585999  | 1430521 | 573599  | 349293  |
| Hydroxyproline    | 45146   | 32479   | 10042   | 9709    |
| Leucine           | 105423  | 136879  | 36710   | 78706   |
| Ornithine         | 2995    | 2321    | 7442    | 4751    |
| Acetylcholine     | 41020   | 34533   | 26048   | 40135   |
| Glutamine         | 717539  | 1169078 | 415262  | 426004  |
| Glutamic acid     | 802393  | 1064476 | 565065  | 494175  |
| Methionine        | 6184    | 16178   | 5989    | 17327   |
| Cystamine         | 385     | 286     | 463     | 320     |
| Histidine         | 24971   | 25645   | 29648   | 35106   |
| Carnitine         | 345     | 74      | 204     | 801     |
| Phenylalanine     | 116729  | 225677  | 56987   | 22502   |
| Quinolate         | 497     | 296     | 283     | 34      |
| Arginine          | 29360   | 99644   | 11604   | 49433   |
| Tyrosine          | 27140   | 49849   | 5676    | 7705    |
| Sorbitol          | 857     | 1599    | 469     | 221     |
| Adrenephrin       | 4517    | 4160    | 1427    | 576     |
| Tryptophan        | 16188   | 37155   | 10038   | 11409   |
| Uridine           | 14086   | 21411   | 7125    | 13352   |
| Adenosine         | 2283452 | 1065809 | 2159771 | 2262761 |
| Inosine           | 291196  | 391261  | 153930  | 434854  |
| Guanosine         | 57153   | 84216   | 6346    | 139619  |
| Lysine            | 663525  | 1332331 | 388874  | 545520  |
| Histamine         | 3062    | 2816    | 1190    | 2483    |
| Homoserine        | 1276    | 965     | 706     | 1120    |
| Niacinamide       | 313843  | 370616  | 242911  | 223881  |
| Thylhistamine     | 9069    | 4169    | 2906    | 5041    |
| Asparagine        | 7344    | 5253    | 1134    | 3769    |
| Cytidine          | 34672   | 16578   | 5111    | 16086   |
| Glutamic Acid     | 259586  | 549921  | 45054   | 59147   |
| Thyladenosine     | 17625   | 11537   | 7304    | 14633   |
| Thylguanosine     | 122     | 450     | 112     | 118     |
| Thylguanosine     | 132     | 451     | 242     | 163     |

**Table S2 (page 2 of 2).**

**Standard error of the mean values for data in Table S1.**

|                          | Vehicle KO to<br>p-value | Vehicle Control<br>p-value | Vehicle Control to<br>p-value | Vehicle Control to<br>p-value |
|--------------------------|--------------------------|----------------------------|-------------------------------|-------------------------------|
| Pyruvate                 | 0.077                    | 0.006                      | 0.074                         | 0.014                         |
| lactate                  | 0.043                    | 0.150                      | 0.105                         | 0.178                         |
| Acetoacetate             | 0.025                    | 0.198                      | 0.069                         | 0.145                         |
| Fumaric                  | 0.113                    | 0.998                      | 0.591                         | 0.727                         |
| Succinate                | 0.047                    | 0.458                      | 0.201                         | 0.353                         |
| Nicotinate (Niacin)      | 0.263                    | 0.741                      | 0.080                         | 0.210                         |
| Glutaric Acid            | 0.159                    | 0.815                      | 0.330                         | 0.609                         |
| Malate                   | 0.913                    | 0.027                      | 0.098                         | 0.021                         |
| Hypoxanthine             | 0.119                    | 0.307                      | 0.087                         | 0.424                         |
| Alpha-Ketoglutaric Acid  | 0.002                    | 0.923                      | 0.167                         | 0.954                         |
| Xanthine                 | 0.215                    | 0.445                      | 0.197                         | 0.487                         |
| Urate                    | 0.048                    | 0.421                      | 0.460                         | 0.590                         |
| PEP                      | 0.025                    | 0.071                      | 0.121                         | 0.100                         |
| D-GA3P                   | 0.871                    | 0.200                      | 0.145                         | 0.296                         |
| Glycerol-3-P             | 0.043                    | 0.081                      | 0.938                         | 0.157                         |
| Hypuric Acid             | 0.578                    | 0.521                      | 0.380                         | 0.642                         |
| Glucose                  | 0.736                    | 0.507                      | 0.089                         | 0.221                         |
| 4-Pyridoxic acid         | 0.497                    | 0.161                      | 0.556                         | 0.244                         |
| 2/3-Phosphoglyceric Acid | 0.021                    | 0.022                      | 0.407                         | 0.042                         |
| Erythrose                | 0.160                    | 0.385                      | 0.102                         | 0.489                         |
| Cystathionine            | 0.663                    | 0.953                      | 0.097                         | 0.438                         |
| G1P/G6P                  | 0.022                    | 0.029                      | 0.008                         | 0.038                         |
| Reduced glutathione      | 0.440                    | 0.159                      | 0.089                         | 0.169                         |
| F16BP/F26BP              | 0.029                    | 0.010                      | 0.273                         | 0.024                         |
| Sucrose                  | 0.187                    | 0.379                      | 0.250                         | 0.345                         |
| Oxidized glutathione     | 0.886                    | 0.319                      | 0.119                         | 0.303                         |
| gamma-Aminobutyrate      | 0.024                    | 0.842                      | 0.164                         | 0.959                         |
| Malonic Acid/3HBA        | 0.108                    | 0.370                      | 0.429                         | 0.477                         |
| Citraconic Acid          | 0.147                    | 0.117                      | 0.125                         | 0.130                         |
| Adenine                  | 0.480                    | 0.690                      | 0.376                         | 0.814                         |
| Aconitate                | 0.363                    | 0.930                      | 0.252                         | 0.222                         |
| Citrulline               | 0.313                    | 0.394                      | 0.059                         | 0.252                         |
| Citric Acid              | 0.742                    | 0.347                      | 0.121                         | 0.297                         |
| Cystine                  | 0.275                    | 0.445                      | 0.139                         | 0.266                         |
| Xanthosine               | 0.008                    | 0.875                      | 0.233                         | 0.939                         |
| Uracil                   | 0.736                    | 0.155                      | 0.987                         | 0.160                         |
| OH-Phenylpyruvate        | 0.224                    | 0.411                      | 0.397                         | 0.318                         |
| Anthranilate             | 0.116                    | 0.399                      | 0.065                         | 0.142                         |
| Glucuronate              | 0.837                    | 0.171                      | 0.047                         | 0.113                         |
| Oxaloacetate             | 0.958                    | 0.898                      | 0.327                         | 0.846                         |
| Propionate               | 0.009                    | 0.013                      | 0.014                         | 0.013                         |
| 2-Aminoadipate           | 0.297                    | 0.353                      | 0.022                         | 0.128                         |
| 3-Nitro-tyrosine         | 0.404                    | 0.364                      | 0.062                         | 0.399                         |
| Ribose-5-P               | 0.079                    | 0.539                      | 0.086                         | 0.648                         |
| Adenylosuccinate         | 0.936                    | 0.929                      | 0.214                         | 0.705                         |
| D-Leucic Acid            | 0.862                    | 0.023                      | 0.115                         | 0.013                         |
| Pyridoxal-5-P            | 0.819                    | 0.502                      | 0.223                         | 0.421                         |
| Adipic Acid              | 0.925                    | 0.173                      | 0.108                         | 0.218                         |
| Methylmalonate           | 0.104                    | 0.983                      | 0.163                         | 0.762                         |
| Methylmalonate           | 0.068                    | 0.479                      | 0.256                         | 0.372                         |
| DHAP                     | 0.748                    | 0.227                      | 0.125                         | 0.313                         |
| G16BP                    | 0.048                    | 0.011                      | 0.249                         | 0.025                         |
| F6P/F1P                  | 0.016                    | 0.023                      | 0.006                         | 0.030                         |
| Oxalic Acid              | 0.020                    | 0.179                      | 0.253                         | 0.222                         |
| Glyceraldehyde           | 0.154                    | 0.234                      | 0.055                         | 0.079                         |
| Glycerate                | 0.595                    | 0.852                      | 0.195                         | 0.419                         |
| Mevalonate               | 0.551                    | 0.044                      | 0.073                         | 0.084                         |
| Allantoin                | 0.346                    | 0.414                      | 0.091                         | 0.176                         |
| Inositol                 | 0.045                    | 0.155                      | 0.094                         | 0.142                         |
| Homovanilate             | 0.002                    | 0.468                      | 0.338                         | 0.499                         |
| Xanthurenate             | 0.464                    | 0.909                      | 0.276                         | 0.950                         |
| Pentothenate             | 0.914                    | 0.576                      | 0.078                         | 0.640                         |
| Biotin                   | 0.390                    | 0.640                      | 0.422                         | 0.564                         |

**Table S3 (page 1 of 2).**

**Statistical significance values for metabolomics comparisons.** See methods for details.



|                        |       |       |       |       |
|------------------------|-------|-------|-------|-------|
| DCMP                   | 0.320 | 0.545 | 0.216 | 0.455 |
| DUMP                   | 0.261 | 0.681 | 0.211 | 0.724 |
| Geranyl Pyrophosphate  | 0.560 | 0.188 | 0.054 | 0.177 |
| DTMP                   | 0.016 | 0.076 | 0.296 | 0.112 |
| CMP                    | 0.954 | 0.074 | 0.072 | 0.073 |
| AMP                    | 0.132 | 0.034 | 0.287 | 0.045 |
| IMP                    | 0.368 | 0.168 | 0.071 | 0.152 |
| ATP                    | 0.356 | 0.183 | 0.122 | 0.271 |
| Fructose/Galactose     | 0.050 | 0.391 | 0.696 | 0.464 |
| Aspartic Acid          | 0.003 | 0.843 | 0.101 | 0.663 |
| Myristic Acid          | 0.792 | 0.794 | 0.077 | 0.687 |
| Margaric Acid          | 0.001 | 0.758 | 0.098 | 0.760 |
| Linolenic Acid         | 0.273 | 0.157 | 0.181 | 0.288 |
| Dopamine               | 0.027 | 0.010 |       |       |
| Glycine                | 0.121 | 0.147 | 0.963 | 0.238 |
| Trimethylamine-N-oxide | 0.276 | 0.674 | 0.104 | 0.642 |
| Alanine                | 0.300 | 0.517 | 0.173 | 0.042 |
| Aminoisobutyrate       | 0.228 | 0.036 | 0.826 | 0.004 |
| Choline                | 0.686 | 0.041 | 0.607 | 0.013 |
| Dimethylglycine        | 0.332 | 0.007 | 0.999 | 0.008 |
| Serine                 | 0.537 | 0.818 | 0.112 | 0.678 |
| Creatinine             | 0.169 | 0.772 | 0.153 | 0.126 |
| Proline                | 0.606 | 0.532 | 0.056 | 0.064 |
| Valine                 | 0.099 | 0.872 | 0.025 | 0.337 |
| Betaine                | 0.922 | 0.297 | 0.449 | 0.634 |
| Threonine              | 0.024 | 0.856 | 0.019 | 0.169 |
| Taurine                | 0.566 | 0.968 | 0.280 | 0.217 |
| Creatine               | 0.867 | 0.666 | 0.291 | 0.779 |
| Hydroxyproline         | 0.139 | 0.336 | 0.161 | 0.802 |
| Leucine                | 0.028 | 0.243 | 0.024 | 0.495 |
| Ornithine              | 0.776 | 0.725 | 0.001 | 0.530 |
| Acetylcholine          | 0.119 | 0.990 | 0.516 | 0.331 |
| Glutamine              | 0.777 | 0.499 | 0.181 | 0.890 |
| Glutamic acid          | 0.810 | 0.702 | 0.172 | 0.604 |
| Methionine             | 0.128 | 0.692 | 0.071 | 0.413 |
| Cystamine              | 0.836 | 0.878 | 0.380 | 0.665 |
| Histidine              | 0.382 | 0.564 | 0.092 | 0.259 |
| Carnitine              | 0.629 | 0.549 | 0.145 | 0.107 |
| Phenylalanine          | 0.027 | 0.078 | 0.519 | 0.174 |
| Quinolate              | 0.827 | 0.544 | 0.215 | 0.756 |
| Arginine               | 0.018 | 0.020 | 0.018 | 0.004 |
| Glucosamine            | 0.386 | n/a   | n/a   | n/a   |
| Tyrosine               | 0.551 | 0.727 | 0.205 | 0.922 |
| Sorbitol               | 0.546 | 0.922 | 0.145 | 0.937 |
| ephrine/Normetanephrin | 0.165 | 0.036 | 0.817 | 0.006 |
| Tryptophan             | 0.156 | 0.006 | 0.653 | 0.004 |
| Uridine                | 0.306 | 0.015 | 0.287 | 0.041 |
| Adenosine              | 0.733 | 0.544 | 0.870 | 0.978 |
| Inosine                | 0.489 | 0.034 | 0.280 | 0.032 |
| Guanosine              | 0.104 | 0.023 | 0.881 | 0.042 |
| Lysine                 | 0.782 | 0.410 | 0.250 | 0.914 |
| Cytosine/Histamine     | 0.021 | 0.545 | 0.639 | 0.743 |
| Homoserine             | 0.131 | 0.548 | 0.095 | 0.761 |
| Niacinamide            | 0.309 | 0.062 | 0.522 | 0.102 |
| 1-Methylhistamine      | 0.296 | 0.881 | 0.370 | 0.122 |
| Asparagine             | 0.008 | 0.458 | 0.427 | 0.589 |
| Cytidine               | 0.008 | 0.659 | 0.953 | 0.373 |
| Pyroglutamic Acid      | 0.005 | 0.109 | 0.198 | 0.165 |
| 1-Methyladenosine      | 0.096 | 0.819 | 0.663 | 0.284 |
| 1-Methylguanosine      | 0.009 | 0.953 | 0.776 | 0.541 |
| 2,2-Dimethylguanosine  | 0.133 | 0.747 | 0.366 | 0.987 |

**Table S3 (page 2 of 2).**

**Statistical values for metabolomics comparisons.** See methods for details.
